# Supplementary material for: FADU: a Quantification Tool for Prokaryotic Transcriptomic Analyses
Source: PubMed Central journal article supplement (PMC7901478; doi:10.1128/msystems.00917-20), 2021-01-12

**A***E. chaffeensis**E. coli*

wBm

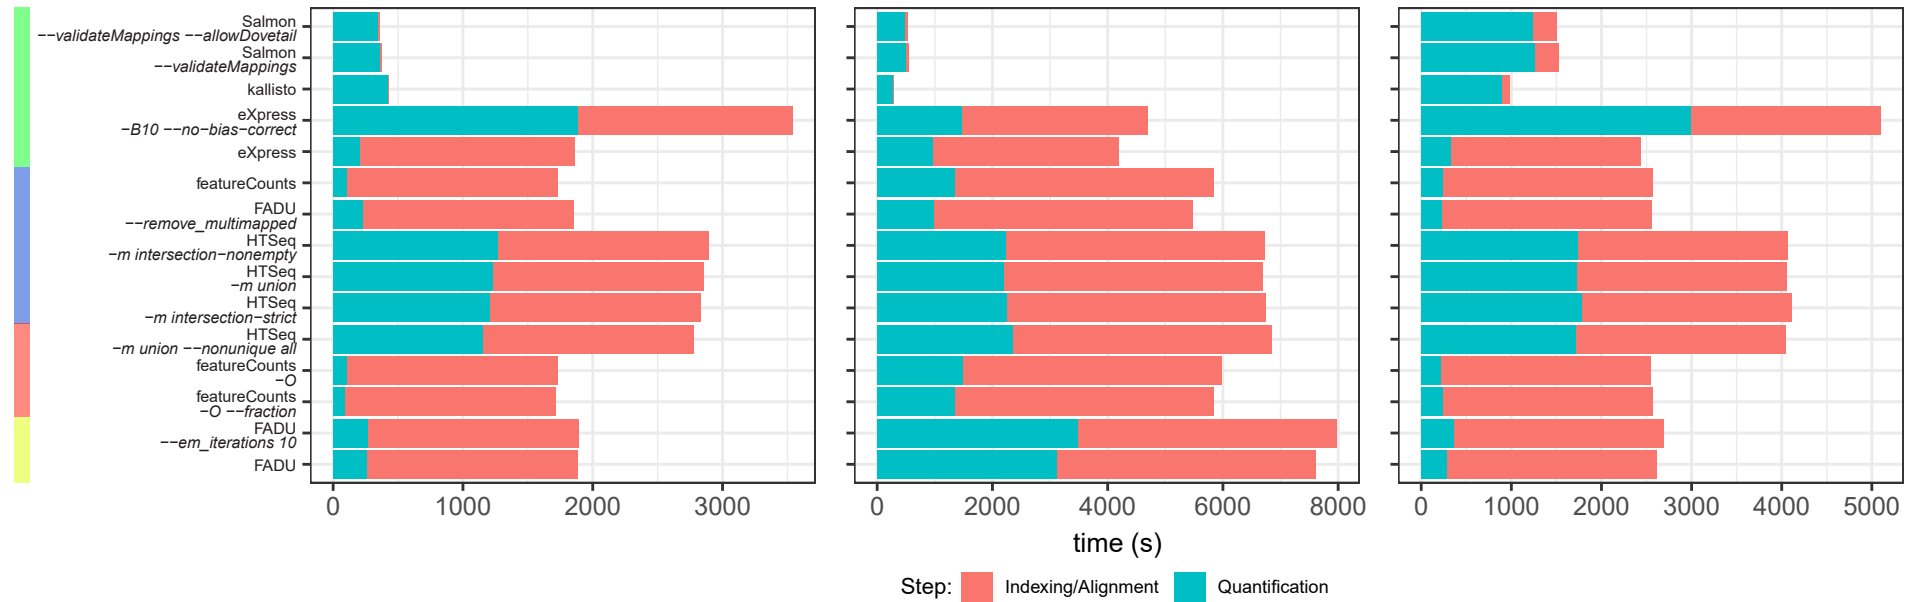

Supplement: mSystems.00917-20_sf003.pdf [file mSystems.00917-20_sf003.pdf]
